# Supplementary material for: Physicochemical characterization and catalytic CO oxidation performance of nanocrystalline Ce–Fe mixed oxides
Source: Royal Society of Chemistry journal article supplement (doi:10.1039/c3ra45778h), 2014-01-01
Supplement: c3ra45778h1.pdf [file c3ra45778h1.pdf]

## **Electronic Supplementary Information**

### **Physicochemical characterization and catalytic CO oxidation performance of nanocrystalline Ce-Fe mixed oxides†**

**Putla Sudarsanam, Baithy Mallesham, D. Naga Durgasri, and Benjaram M. Reddy\***

Inorganic and Physical Chemistry Division, CSIR – Institute of Chemical Technology, Uppal Road, Hyderabad – 500 607, India

\*Author to whom correspondence should be addressed. Phone: +91 40 2719 1714. Fax: +91 40 2716 0921. E-mail: [bmreddy@iict.res.in](mailto:bmreddy@iict.res.in), [mreddyb@yahoo.com](mailto:mreddyb@yahoo.com)

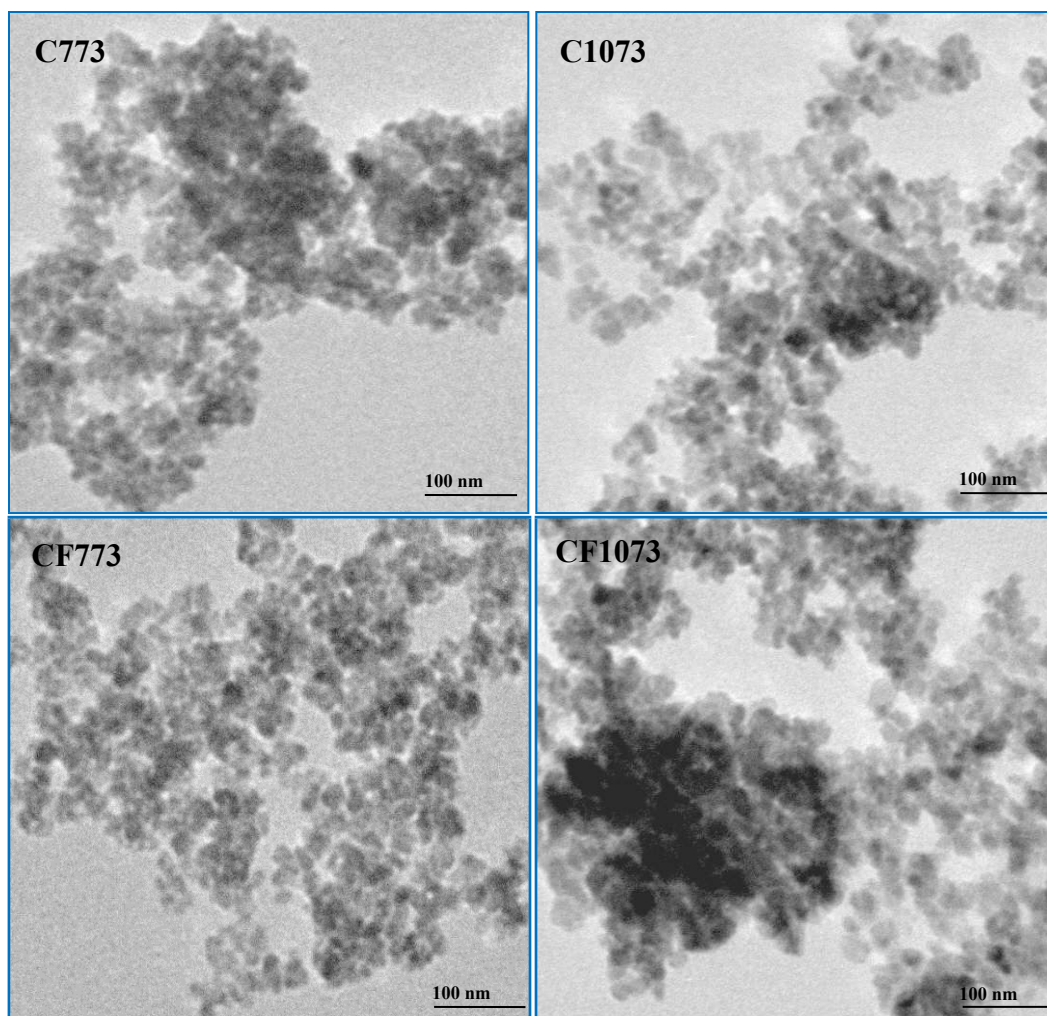

Fig. S1 TEM images of  $\text{CeO}_2$  (C) and Ce-Fe (CF) samples calcined at 773 and 1073 K.

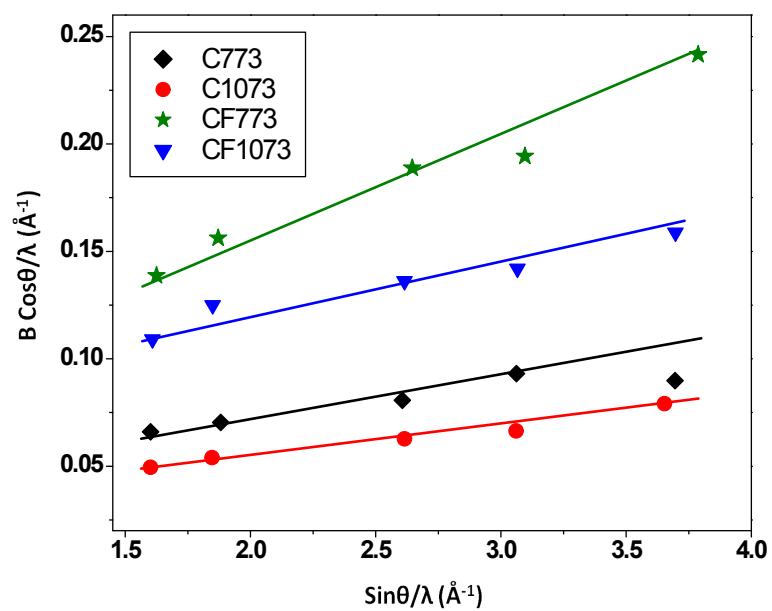

**Fig. S2** Williamson-Holl plots of  $\text{CeO}_2$  (C) and Ce-Fe (CF) samples calcined at 773 and 1073 K.

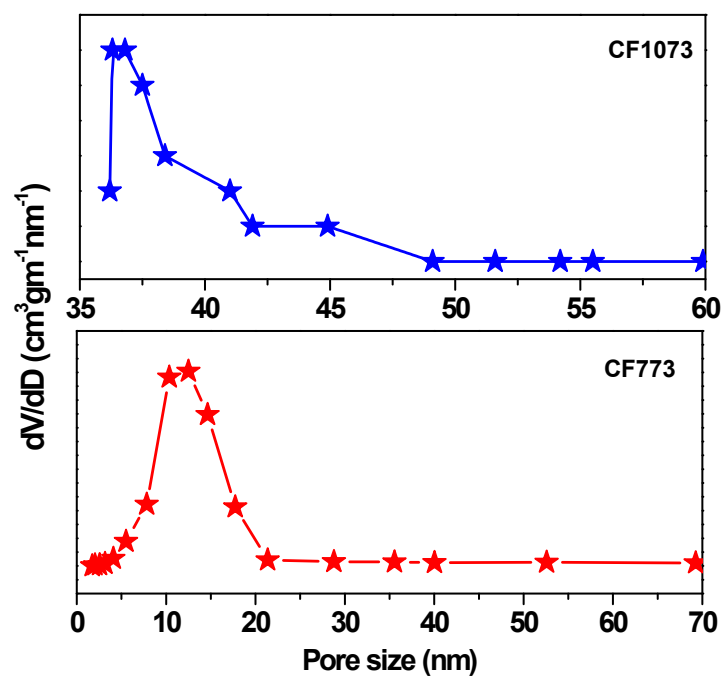

**Fig. S3** Pore size distribution profiles of Ce-Fe (CF) sample calcined at 773 and 1073 K.

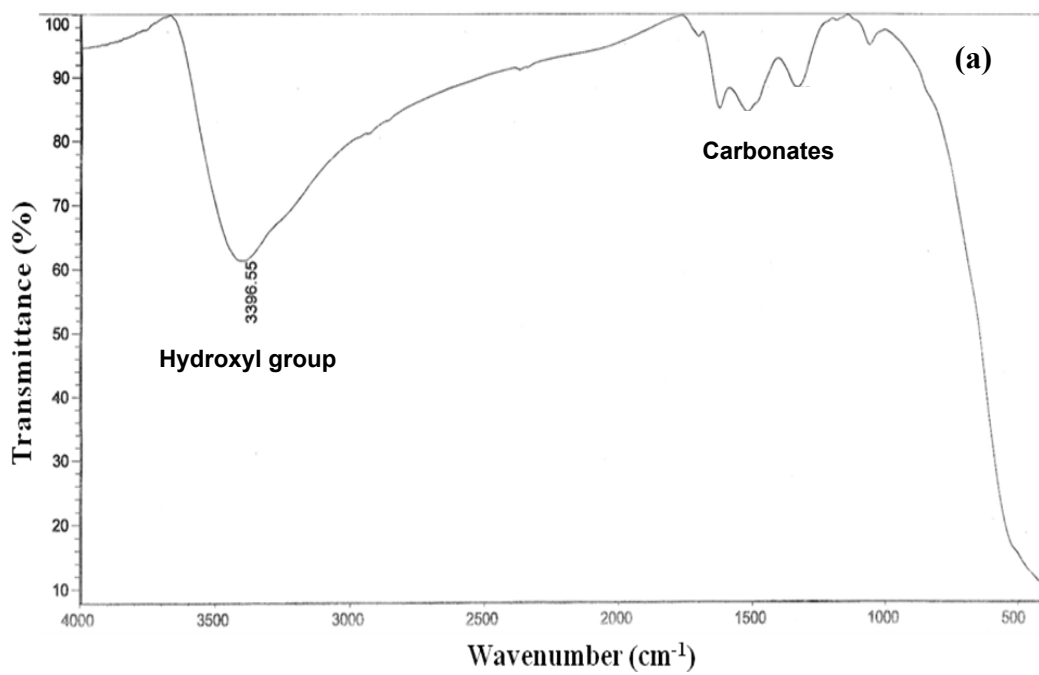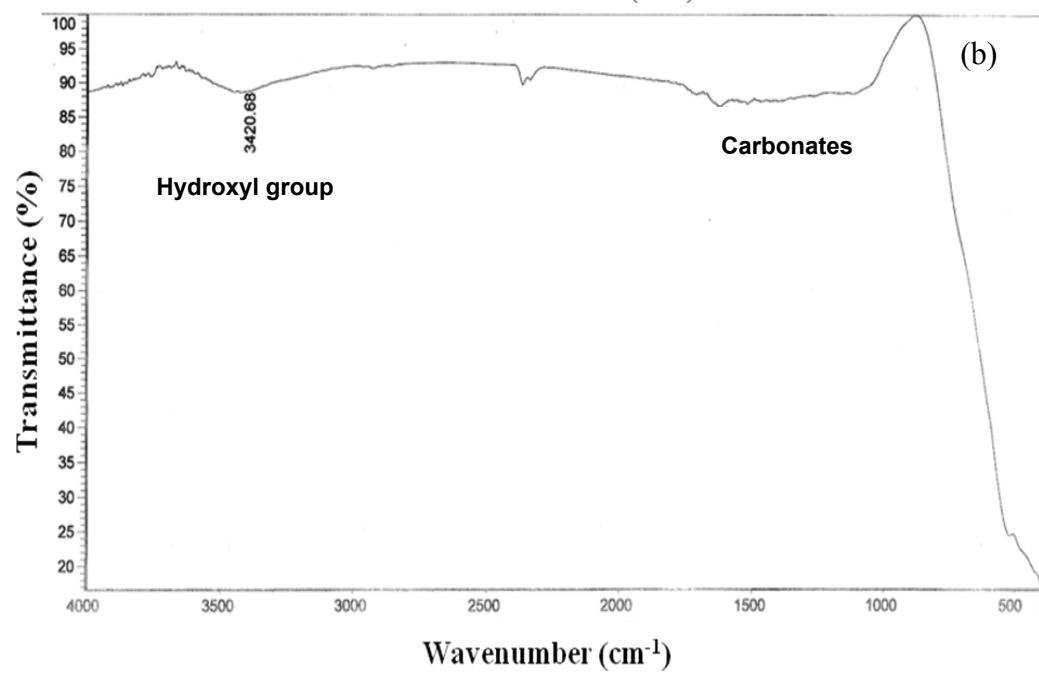

**Fig. S4** FT-IR spectra of Ce-Fe sample calcined at 773 (a) and 1073 K (b).

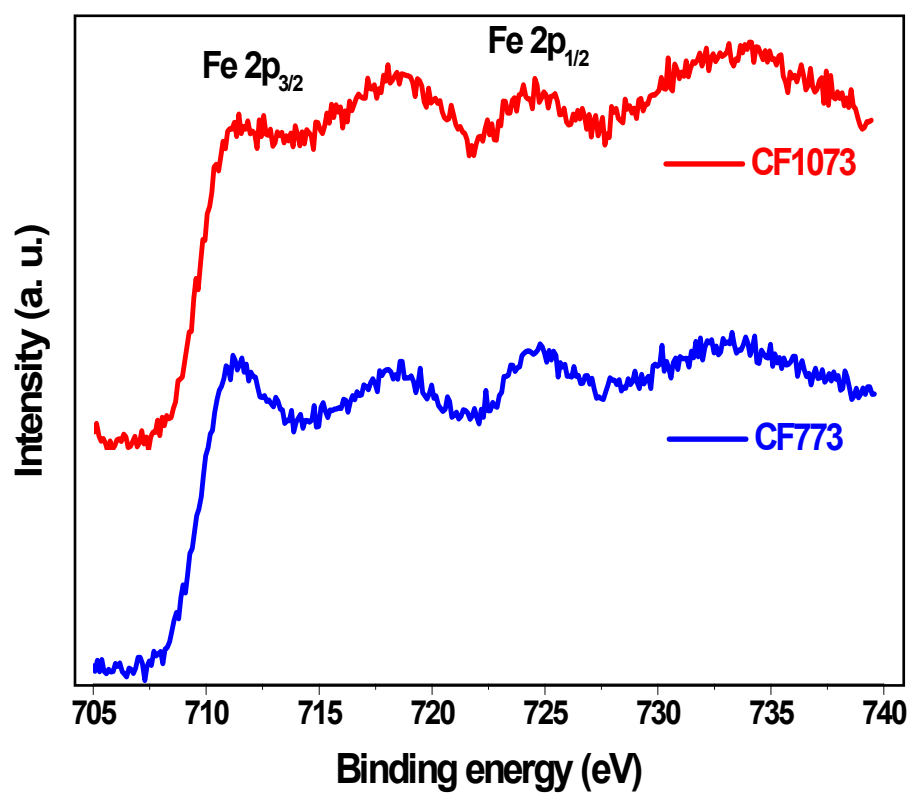

**Fig. S5** Fe 2p core level XPS spectra of Ce-Fe (CF) sample calcined at 773 and 1073 K.
